# Supplementary material for: Der longitudinale Zusammenhang von Coparenting, Beziehungsqualität und kindlichen psychischen Störungen
Source: Atypon-hosted journal article supplement (doi:10.1026/1616-3443/a000576), 2020-04-01
Supplement: 1616-3443_a000576_esm1.pdf [file 1616-3443_a000576_esm1.pdf]

ESM Tabelle E1

*Interkorrelationen zwischen soziodemographischen Variablen und dem gemittelten Gesamtwert (Mittelwert von Prä bis FU4) der Erziehungskonfliktskala (EKS) sowie dem Fragebogen zur Beurteilung einer Zweierbeziehung (FBZ).*

|                       | Mütter        |               | Väter         |               |
|-----------------------|---------------|---------------|---------------|---------------|
|                       | EKS (Prä-FU4) | FBZ (Prä-FU4) | EKS (Prä-FU4) | FBZ (Prä-FU4) |
| Alter Mutter          | -.01          | -.20**        | .01           | -.17*         |
| Alter Vater           | .02           | -.06          | .06           | -.09          |
| Schulabschluss Mutter | -.21**        | .06           | -.16*         | .11           |
| Schulabschluss Vater  | -.24**        | .00           | -.11          | -.08          |
| Haushaltseinkommen    | -.17*         | .04           | -.13          | .05           |
| Geschlecht Kind       | .07           | .00           | -.03          | .05           |
| Schule Kind           | .17*          | -.12          | .14           | -.09          |

Anmerkungen. \*  $p < .05$ , \*\*  $p < .01$ ; EKS = Erziehungskonfliktskala, FBZ = Fragebogen zur Beurteilung einer Zweierbeziehung.
