# Supplementary material for: Der longitudinale Zusammenhang von Coparenting, Beziehungsqualität und kindlichen psychischen Störungen
Source: Atypon-hosted journal article supplement (doi:10.1026/1616-3443/a000576), 2020-04-01
Supplement: 1616-3443_a000576_esm2.pdf [file 1616-3443_a000576_esm2.pdf]

ESM Tabelle E2

*Interkorrelationen zwischen dem Gesamtwert der Erziehungskonfliktskala (EKS) sowie dem Fragebogen zur Einschätzung einer Zweierbeziehung (FBZ) nach der mütterlichen Einschätzung.*

| <b>Mütter</b> |             | <b>FBZ</b> |            |            |            |            |             |
|---------------|-------------|------------|------------|------------|------------|------------|-------------|
|               |             | <b>Prä</b> | <b>FU1</b> | <b>FU2</b> | <b>FU3</b> | <b>FU4</b> | <b>FU10</b> |
| <b>Prä</b>    |             | -.55       | -.43       | -.44       | -.41       | -.45       | -.28        |
| <b>FU1</b>    |             | -.51       | -.62       | -.54       | -.50       | -.56       | -.36        |
| <b>EKS</b>    | <b>FU2</b>  | -.54       | -.55       | -.68       | -.55       | -.56       | -.33        |
|               | <b>FU3</b>  | -.54       | -.53       | -.60       | -.64       | -.60       | -.38        |
|               | <b>FU4</b>  | -.53       | -.52       | -.53       | -.50       | -.64       | -.40        |
|               | <b>FU10</b> | -.24       | -.31       | -.32       | -.31       | -.32       | -.49        |

*Anmerkungen.*  $N = 198 - 217$ ; alle Korrelationen sind nach der Bonferroni-Korrektur ( $.05/36 = .001389$ ) signifikant ( $p < .001$ ); EKS = Erziehungskonfliktskala; FBZ = Fragebogen zur Beurteilung einer Zweierbeziehung.
