# Supplementary material for: Der longitudinale Zusammenhang von Coparenting, Beziehungsqualität und kindlichen psychischen Störungen
Source: Atypon-hosted journal article supplement (doi:10.1026/1616-3443/a000576), 2020-04-01
Supplement: 1616-3443_a000576_esm3.pdf [file 1616-3443_a000576_esm3.pdf]

ESM Tabelle E3

*Interkorrelationen zwischen dem Gesamtwert der Erziehungskonfliktskala (EKS) sowie dem Fragebogen zur Einschätzung einer Zweierbeziehung (FBZ) nach der väterlichen Einschätzung.*

| <b>Väter</b> |             | <b>FBZ</b> |            |            |            |            |             |
|--------------|-------------|------------|------------|------------|------------|------------|-------------|
|              |             | <b>Prä</b> | <b>FU1</b> | <b>FU2</b> | <b>FU3</b> | <b>FU4</b> | <b>FU10</b> |
| <b>Prä</b>   |             | -0.53      | -0.42      | -0.34      | -0.37      | -0.38      | -0.31       |
| <b>FU1</b>   |             | -0.50      | -0.53      | -0.44      | -0.40      | -0.49      | -0.43       |
| <b>EKS</b>   | <b>FU2</b>  | -0.46      | -0.51      | -0.58      | -0.51      | -0.51      | -0.45       |
|              | <b>FU3</b>  | -0.49      | -0.50      | -0.52      | -0.57      | -0.50      | -0.42       |
|              | <b>FU4</b>  | -0.57      | -0.56      | -0.54      | -0.53      | -0.67      | -0.48       |
|              | <b>FU10</b> | -0.46      | -0.44      | -0.45      | -0.40      | -0.46      | -0.52       |

*Anmerkungen.*  $N = 170 - 201$ ; alle Korrelationen sind nach der Bonferroni-Korrektur ( $.05/36 = .001389$ ) signifikant ( $p < .001$ ); EKS = Erziehungskonfliktskala; FBZ = Fragebogen zur Beurteilung einer Zweierbeziehung.
