# Supplementary material for: Der longitudinale Zusammenhang von Coparenting, Beziehungsqualität und kindlichen psychischen Störungen
Source: Atypon-hosted journal article supplement (doi:10.1026/1616-3443/a000576), 2020-04-01
Supplement: 1616-3443_a000576_esm4.pdf [file 1616-3443_a000576_esm4.pdf]

ESM Tabelle E4

*Darstellung der Zusammenhänge der mütterlichen und väterlichen Einschätzung der Child Behavior Checklist (CBCL; Prä-FU10) über die einzelnen Messzeitpunkte. Weiterhin werden die Interkorrelationen zwischen der mütterlichen und väterlichen Einschätzung sowie zur jugendlichen Einschätzung durch den Youth-Self-Report (YSR; FU10) abgebildet.*

|                                              | <b>Prä-FU1</b> | <b>FU1-FU2</b> | <b>FU2-FU3</b> | <b>FU3-FU4</b> | <b>FU4-FU10</b> | <b>MW</b>   |     |
|----------------------------------------------|----------------|----------------|----------------|----------------|-----------------|-------------|-----|
| <b>Mütter (CBCL)</b>                         | .76            | .73            | .86            | .83            | .63             | .76         |     |
| <b>Väter (CBCL)</b>                          | .66            | .65            | .80            | .84            | .66             | .72         |     |
|                                              | <b>Prä</b>     | <b>FU1</b>     | <b>FU2</b>     | <b>FU3</b>     | <b>FU4</b>      | <b>FU10</b> |     |
| <b>Interkorrelationen:</b>                   |                |                |                |                |                 |             |     |
| <input type="checkbox"/> <b>Mutter/Vater</b> | .64            | .55            | .63            | .66            | .62             | .67         | .63 |
| <input type="checkbox"/> <b>Mutter/Kind</b>  |                |                |                |                |                 | .47         | .47 |
| <input type="checkbox"/> <b>Vater/Kind</b>   |                |                |                |                |                 | .43         | .43 |

*Anmerkungen.*  $N = 170 - 217$ ; alle Korrelationen sind signifikant ( $p < .001$ ); CBCL = Child Behavior Checklist; YSR = Youth-Self-Report.
