# Supplementary material for: Der longitudinale Zusammenhang von Coparenting, Beziehungsqualität und kindlichen psychischen Störungen
Source: Atypon-hosted journal article supplement (doi:10.1026/1616-3443/a000576), 2020-04-01
Supplement: 1616-3443_a000576_esm5.pdf [file 1616-3443_a000576_esm5.pdf]

ESM Tabelle E5

*Multiple lineare Regressionen: Kriterien: Child Behavior Checklist-Gesamtwert von Mutter und Vater zu FU4 und FU10; Youth-Self-Report-Gesamtwert vom Jugendlichen zu FU10; Prädiktoren: Erziehungskonfliktskala und Fragebogen zur Beurteilung einer Zweierbeziehung (Prä - FU4, FU10) von Mutter und Vater.*

| <b>Kriterium</b>                  | <b>N</b> | <b>F</b> | <b>p</b>  | <b>Korr. R<sup>2</sup></b> | <b>DW</b> | <b>B</b>             | <b>SE[B]</b> | <b>VIF</b> | <b><sup>2</sup></b> | <b>p</b>  | <b>B</b>             | <b>SE[B]</b> | <b>VIF</b> | <b><sup>2</sup></b> | <b>p</b> |
|-----------------------------------|----------|----------|-----------|----------------------------|-----------|----------------------|--------------|------------|---------------------|-----------|----------------------|--------------|------------|---------------------|----------|
| <b>Prädiktoren (Längsschnitt)</b> |          |          |           |                            |           | <b>EKS (Prä-FU4)</b> |              |            |                     |           | <b>FBZ (Prä-FU4)</b> |              |            |                     |          |
| <b>CBCL-G M FU4</b>               | 183      | 11       | < .001*** | .10                        | 2.0       | 1.7                  | 0.6          | 1.9        | .29                 | .003**    | -0.2                 | 0.3          | 1.9        | -.04                | .661     |
| <b>CBCL-G V FU4</b>               | 167      | 17       | < .001*** | .16                        | 2.3       | 1.2                  | 0.5          | 1.8        | .24                 | .012*     | -0.6                 | 0.3          | 1.8        | -.21                | .027*    |
| <b>CBCL-G M FU10</b>              | 170      | 7        | .001**    | .07                        | 2.0       | 1.8                  | 0.6          | 1.9        | .30                 | .004**    | 0.2                  | 0.4          | 1.9        | .04                 | .698     |
| <b>CBCL-G V FU10</b>              | 148      | 7        | .002**    | .08                        | 2.0       | 1.2                  | 0.7          | 1.8        | .18                 | .088      | -0.5                 | 0.4          | 1.8        | -.13                | .213     |
| <b>Prädiktoren (Querschnitt)</b>  |          |          |           |                            |           | <b>EKS (FU10)</b>    |              |            |                     |           | <b>FBZ (FU10)</b>    |              |            |                     |          |
| <b>CBCL-G M FU10</b>              | 181      | 6        | .005**    | .05                        | 2.0       | 1.3                  | 0.4          | 1.3        | .24                 | .004**    | -0.0                 | 0.2          | 1.3        | -.01                | .922     |
| <b>CBCL-G V FU10</b>              | 166      | 15       | < .001*** | .15                        | 2.0       | 2.4                  | 0.5          | 1.4        | .45                 | < .001*** | 0.4                  | 0.2          | 1.4        | .14                 | .102     |
| <b>YSR-G M FU10</b>               | 187      | 7        | .002**    | .06                        | 2.0       | 0.9                  | 0.5          | 1.3        | .16                 | .049*     | -0.4                 | 0.3          | 1.3        | -.14                | .094     |
| <b>YSR-G V FU10</b>               | 169      | 5        | .005**    | .05                        | 2.1       | 1.2                  | 0.6          | 1.4        | .19                 | .032*     | -0.3                 | 0.3          | 1.4        | -.09                | .316     |

*Anmerkungen.* \*  $p < .05$ , \*\*  $p < .01$ ., \*\*\* $p < .001$ ; VIF = Varianzinflationsfaktoren; DW = Durbin-Watson-Statistik; EKS = Erziehungskonfliktskala; FBZ = Fragebogen zur Beurteilung einer Zweierbeziehung; CBCL = Child Behavior Checklist; YSR = Youth-Self-Report; M = Mutter; V = Vater.
