# Supplementary material for: Der longitudinale Zusammenhang von Coparenting, Beziehungsqualität und kindlichen psychischen Störungen
Source: Atypon-hosted journal article supplement (doi:10.1026/1616-3443/a000576), 2020-04-01
Supplement: 1616-3443_a000576_esm6.pdf [file 1616-3443_a000576_esm6.pdf]

ESM Tabelle E6

*Multiple lineare Regressionen: Kriterien: Child Behavior Checklist-Gesamtwert von Mutter und Vater zu FU10 sowie die Differenz der Gesamtwerte ("FU10-Prä"); Prädiktoren: Erziehungskonfliktskala und Fragebogen zur Beurteilung einer Zweierbeziehung zu Prä sowie deren Interaktionsterm von Mutter und Vater.*

| Kriterium               | N                          | F | p        | Korr. R <sup>2</sup> | DW  | B         | SE[B] | VIF | <sup>2</sup> | p        | B         | SE[B] | VIF | <sup>2</sup> | p    | B                         | SE[B] | VIF | <sup>2</sup> | p    |
|-------------------------|----------------------------|---|----------|----------------------|-----|-----------|-------|-----|--------------|----------|-----------|-------|-----|--------------|------|---------------------------|-------|-----|--------------|------|
|                         | Prädiktoren (Längsschnitt) |   |          |                      |     | EKS (Prä) |       |     |              |          | FBZ (Prä) |       |     |              |      | Interaktion EKS*FBZ (Prä) |       |     |              |      |
| <b>CBCL-G M FU10</b>    | 194                        | 8 | <.001*** | .10                  | 2.1 | 1.8       | 0.5   | 1.7 | .36          | <.001*** | 0.0       | 0.3   | 1.5 | -.01         | .892 | 1.2                       | 1.1   | 1.4 | .09          | .281 |
| <b>CBCL-G V FU10</b>    | 168                        | 6 | <.001*** | .09                  | 2.0 | 2.0       | 0.5   | 1.6 | .37          | <.001*** | 0.0       | .27   | 1.4 | .03          | .766 | 1.7                       | 0.9   | 1.3 | .16          | .060 |
| <b>CBCL Differenz M</b> | 194                        | 2 | .167     | .01                  | 1.8 | 0.5       | 0.5   | 1.7 | .09          | .329     | 0.4       | 0.3   | 1.5 | .12          | .164 | 1.8                       | 1.2   | 1.4 | .13          | .139 |
| <b>CBCL Differenz V</b> | 168                        | 1 | .239     | .01                  | 1.7 | -0.3      | 0.6   | 1.6 | -.04         | .657     | 0.4       | 0.3   | 1.4 | .12          | .209 | 0.4                       | 1.0   | 1.3 | .03          | .723 |

*Anmerkungen.* \*  $p < .05$ , \*\*  $p < .01$ ., \*\*\*  $p < .001$ ; VIF = Varianzinflationsfaktoren; DW = Durbin-Watson-Statistik; EKS = Erziehungskonfliktskala; FBZ = Fragebogen zur Beurteilung einer Zweierbeziehung; CBCL = Child Behavior Checklist; M = Mutter; V = Vater.
